# Supplementary material for: A comprehensive catalogue of somatic mutations from a human cancer genome
Source: Springer Nature journal article supplement (doi:10.1038/nature08658), 2009-12-16
Supplement: 41586_2010_BFnature08658_MOESM293_ESM.pdf [file 41586_2010_BFnature08658_MOESM293_ESM.pdf]

## SUPPLEMENTARY INFORMATION

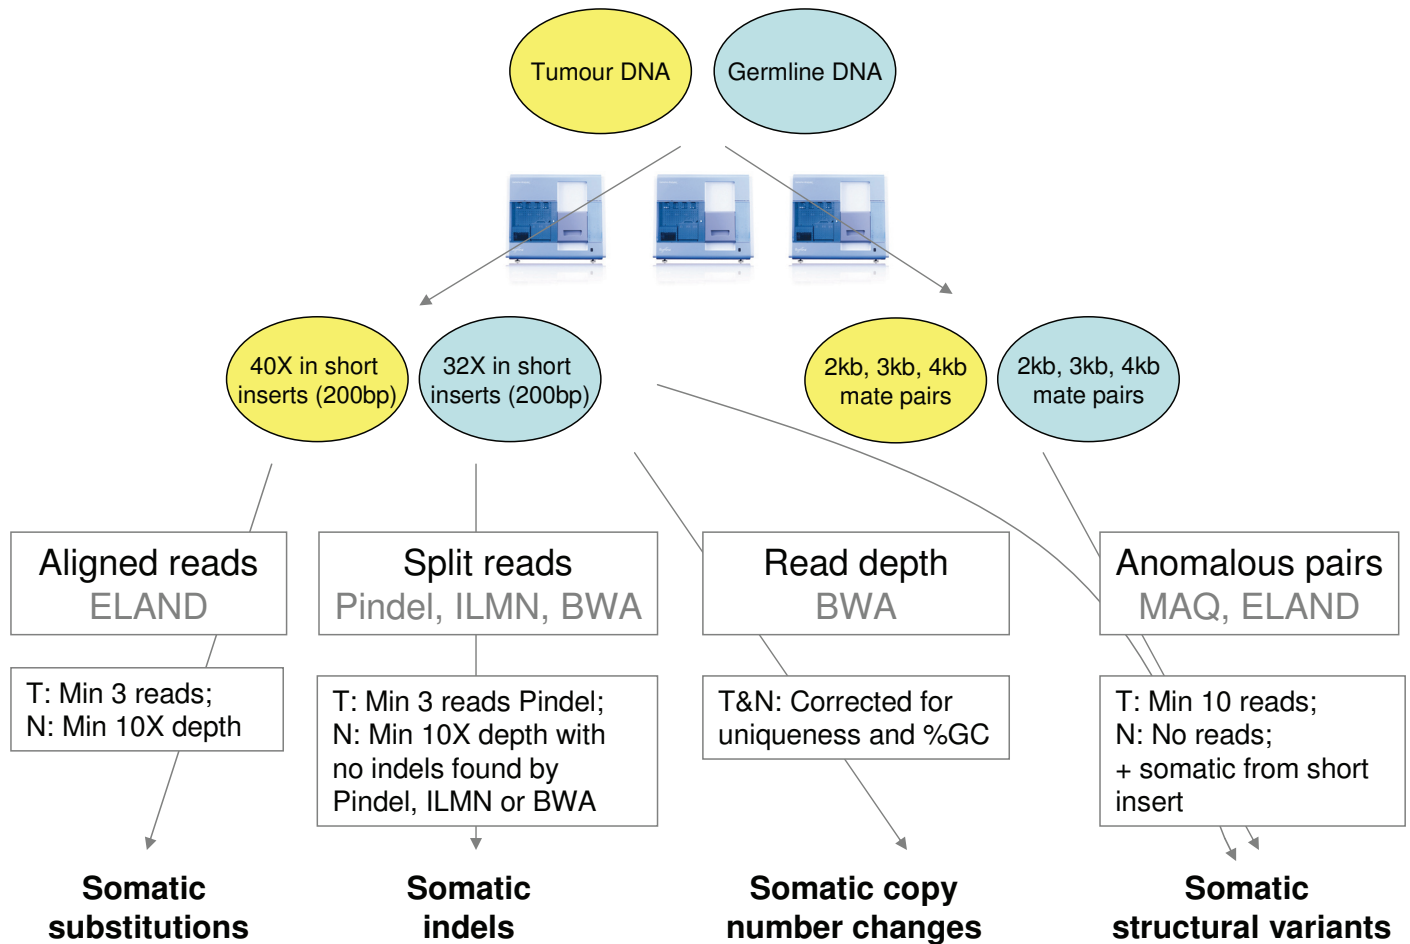

**Supplementary Figure 1.** Overview of approach for sequencing and variant detection. T: tumor; N: normal.
